# Supplementary material for: Tunable Li-ion diffusion properties in MoSSe bilayer anodes by strain gradient
Source: Royal Society of Chemistry journal article supplement (doi:10.1039/d3cp04650h), 2023-11-30
Supplement: d3cp04650h1.pdf [file d3cp04650h1.pdf]

## Supporting Information for Tunable Li-ion diffusion properties in MoSSe bilayer anode by strain gradient

Li Zhong<sup>a</sup>, Xiaobao Li<sup>a,\*</sup>, Yuxue Pu<sup>a</sup>, Meiqin Wang<sup>a</sup>, Chunxiao Zhan<sup>a</sup> and Xinle Xiao<sup>b,#</sup>

<sup>a</sup> School of Civil Engineering, Hefei University of Technology, Anhui 230009, China

<sup>b</sup> Anhui Engineering Research Center of Highly Reactive Micro-Nano Powders, Chizhou University, Anhui 247000, China

\*xiaobaoli@hfut.edu.cn

#xlxiao@mail.usc.edu.cn

Snapshots from AIMD simulations on pristine MoSSe bilayers.

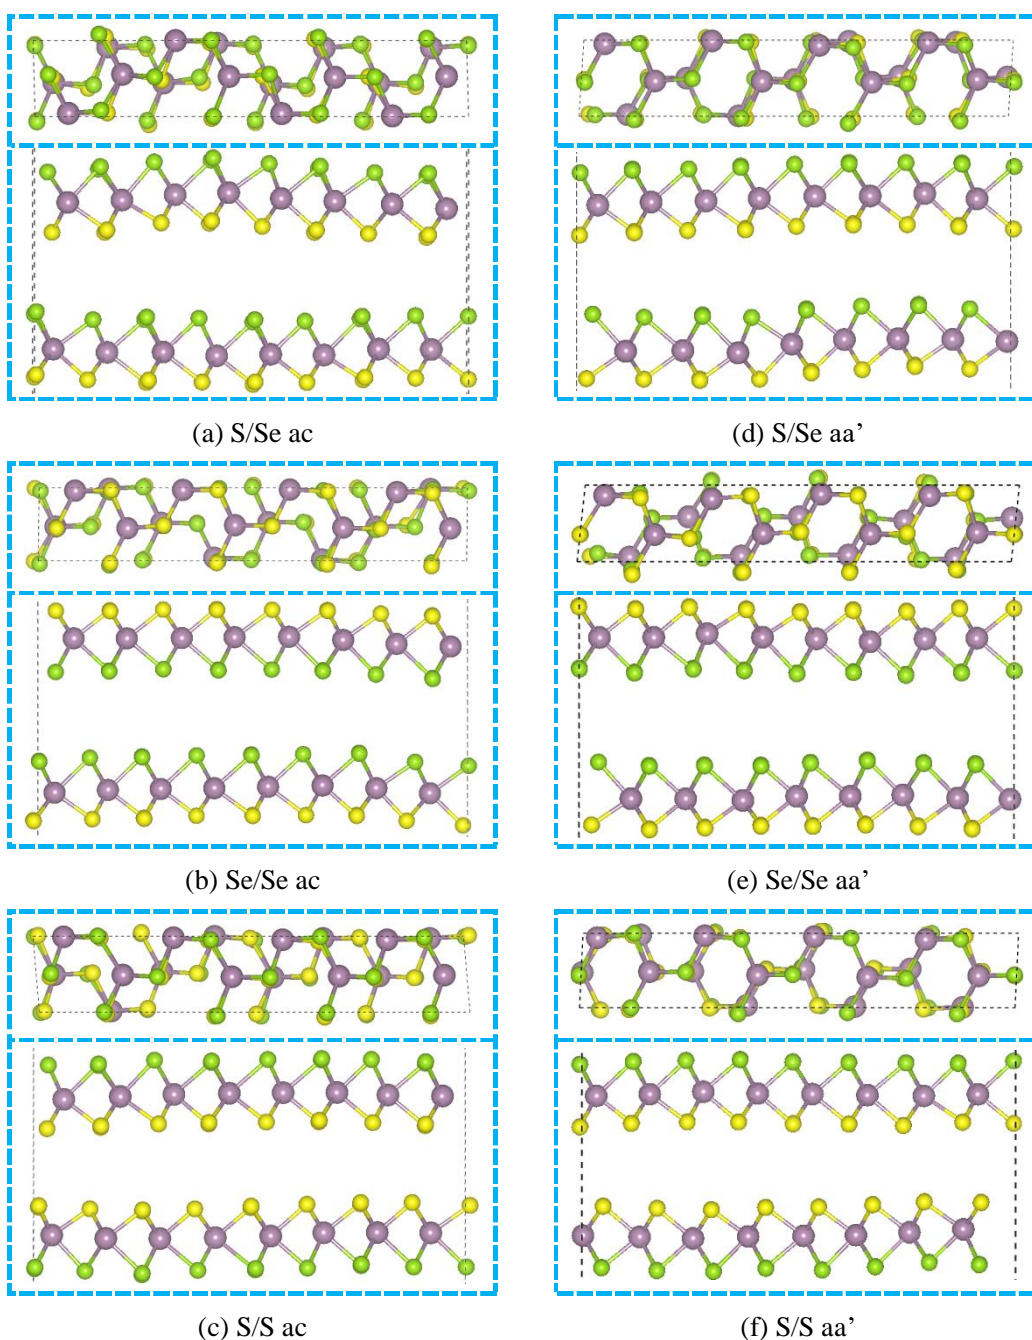

Fig. S1. The captured snapshots from AIMD simulations at 300 K and 25 ps for pristine (a) S/Se ac, (b) Se/Se ac, (c) S/S ac (d) S/Se aa', (e) Se/Se aa' and (f) S/S aa' stacking models.

**Energy oscillations and associated snapshots for MoS<sub>2</sub>Se bilayers under loads in AIMD simulations.**

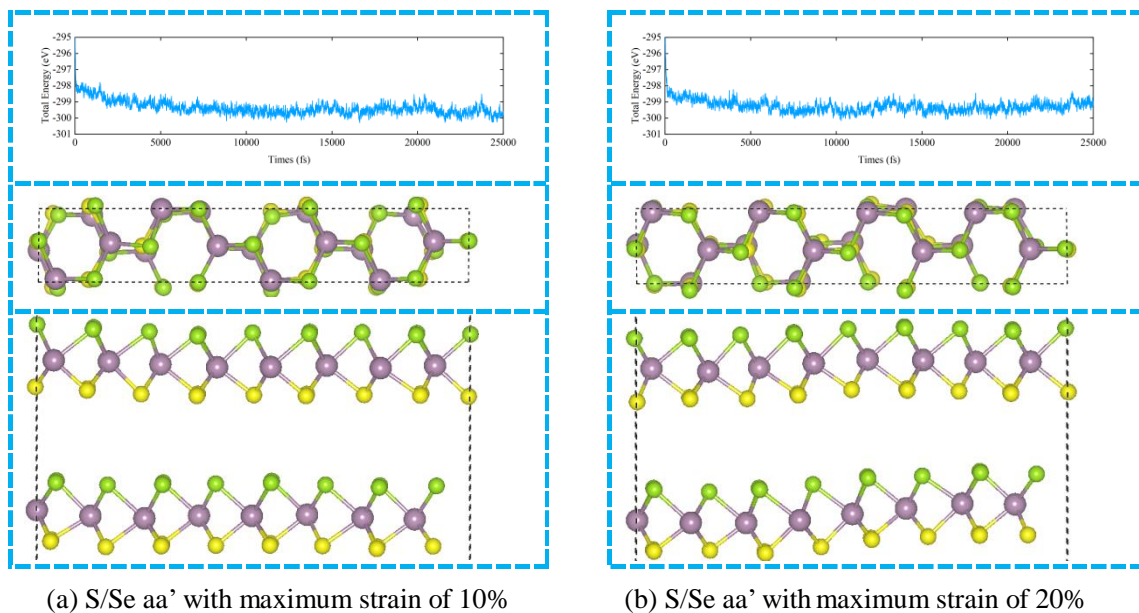

Fig. S2. The energy oscillations from AIMD simulations and associated snapshots (top and side views) at 300 K for S/Se aa' under strain gradient with maximum strains of (a) 10% and (b) 20%.

**Possible adsorption sites of Li ions on MoS<sub>2</sub>Se bilayer models.**

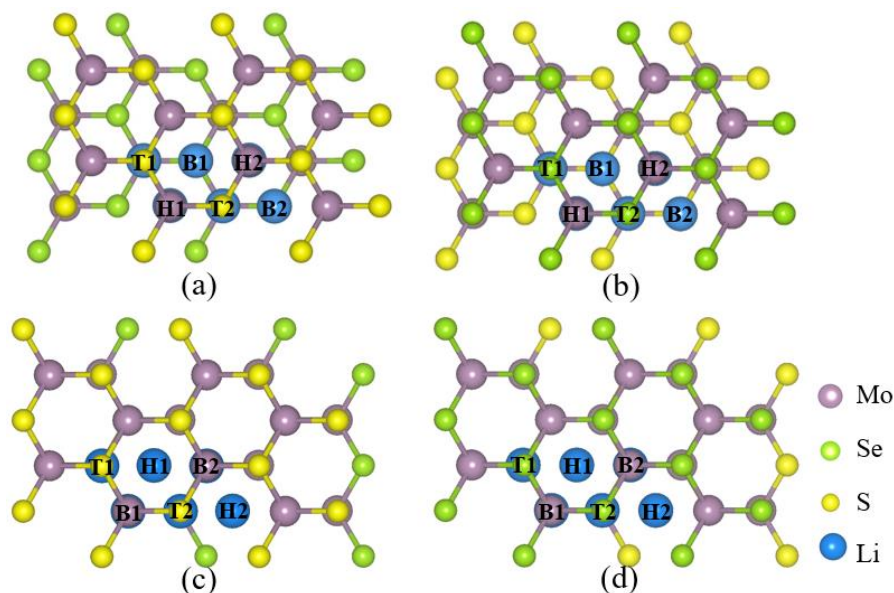

Fig. S3. Possible adsorption sites of Li ions on MoS<sub>2</sub>Se bilayer with stacking patterns of (a) Se/Se ac, (b) S/S ac, (c) Se/Se aa' and (d) S/S aa'.

### Adsorption energies of multiple Li ions on MoS<sub>2</sub> bilayer.

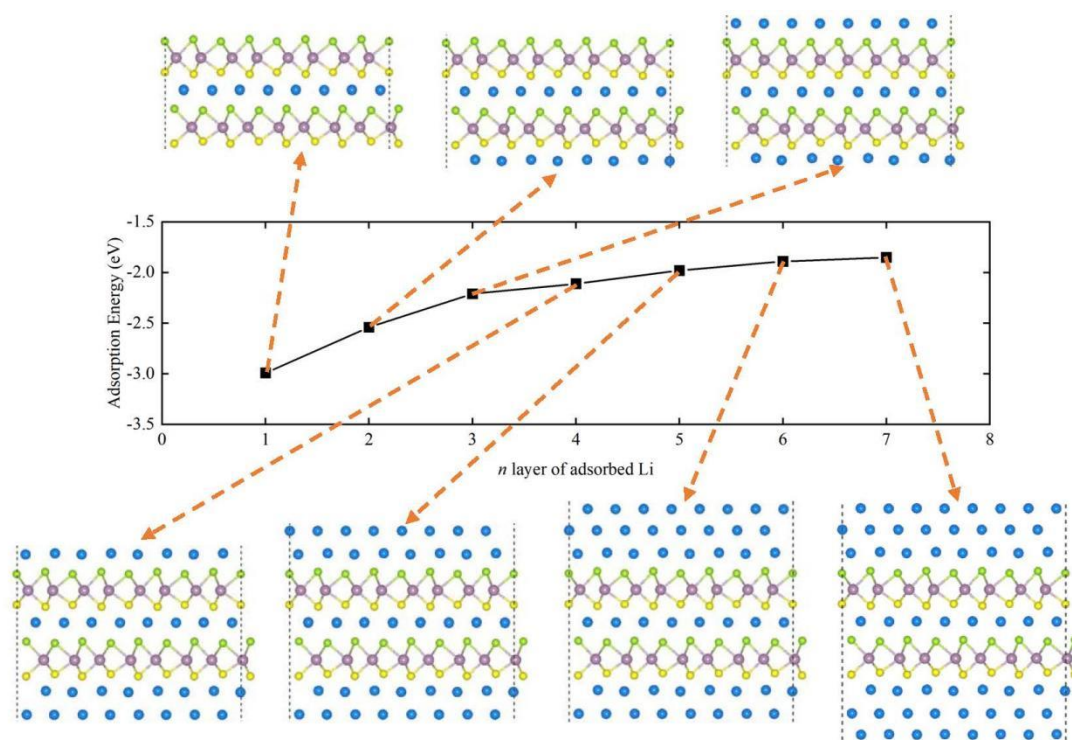

Fig. S4. Adsorption energies of Multilayer Li ions on MoS<sub>2</sub> bilayer.

Charge density differences for MoSSe bilayer with adsorbed Li ions.

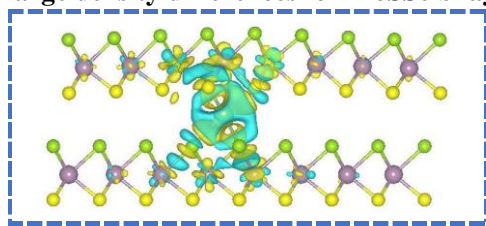

0

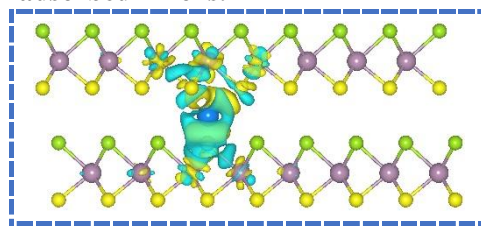

0

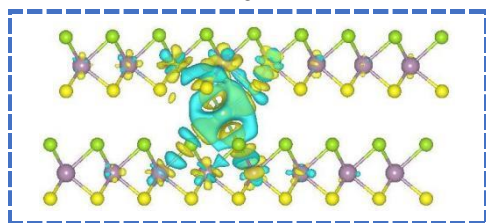

5%

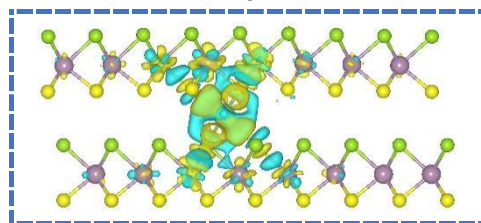

5%

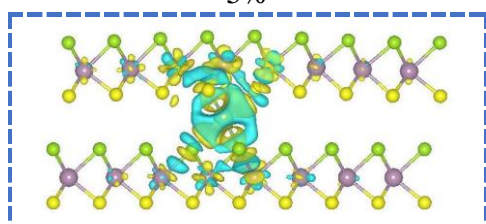

10%

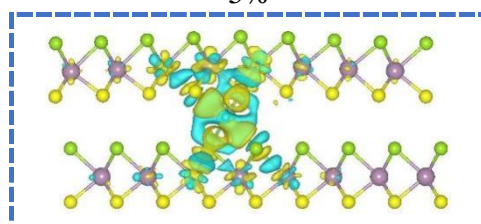

10%

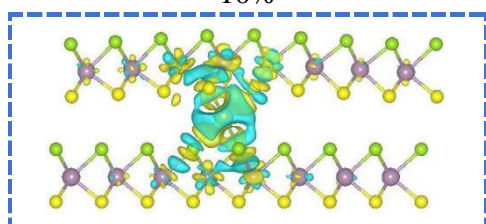

15%

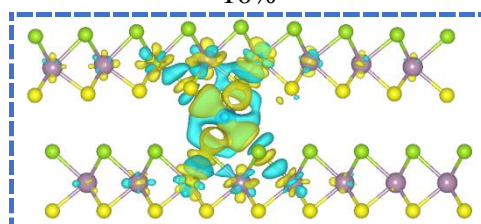

15%

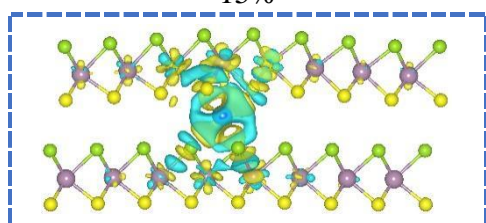

20%

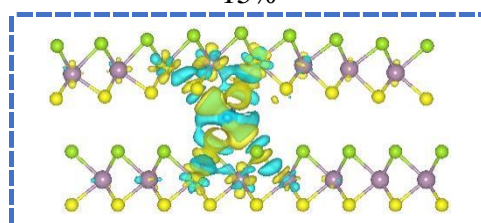

20%

(a) S/Se ac

(b) S/Se aa'

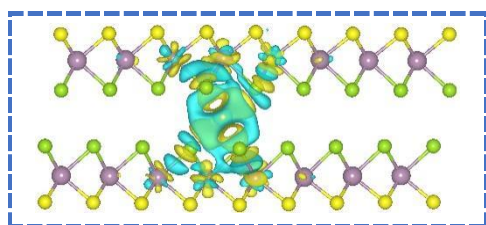

0

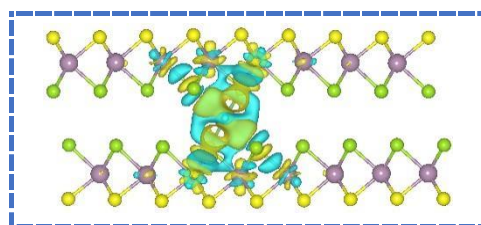

0

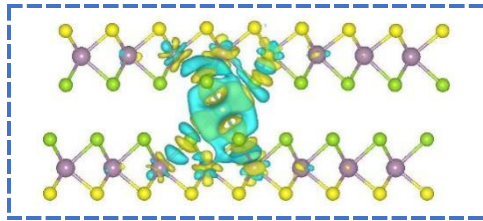

5%

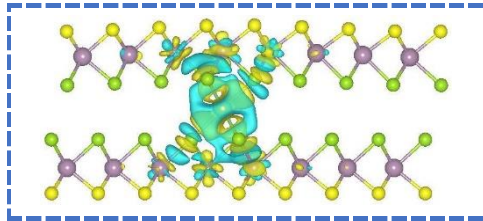

10%

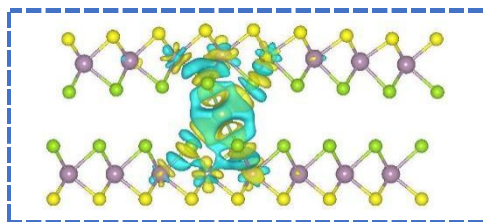

15%

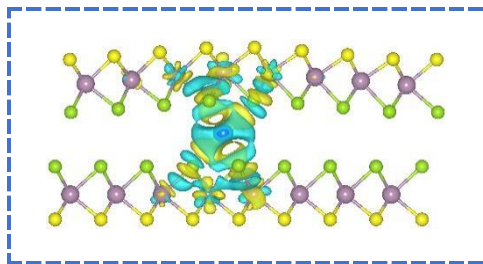

20%

(c) Se/Se ac

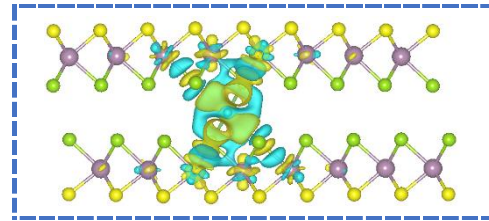

5%

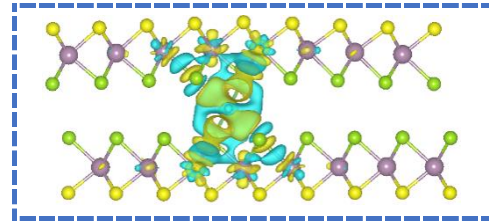

10%

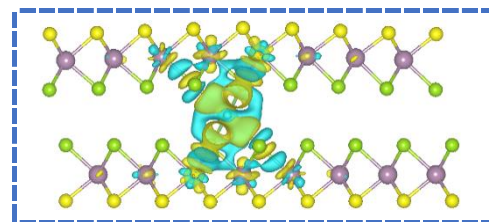

15%

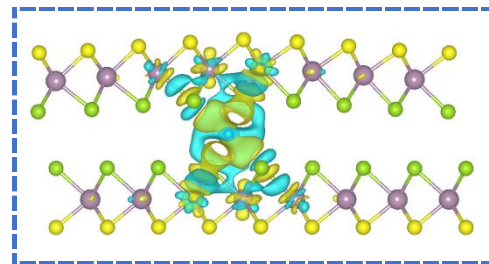

20%

(d) Se/Se aa'

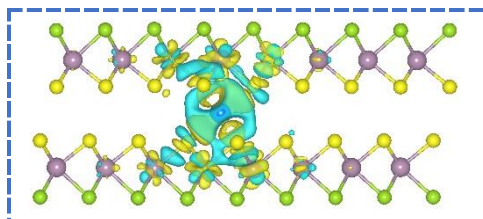

0

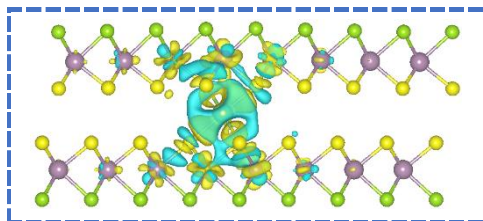

5%

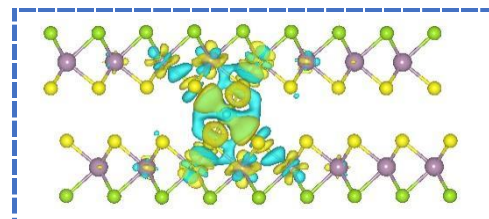

0

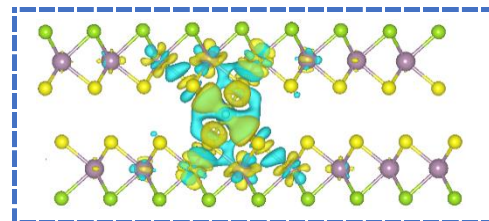

5%

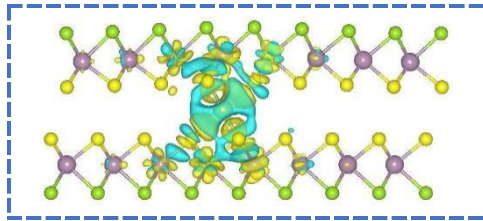

10%

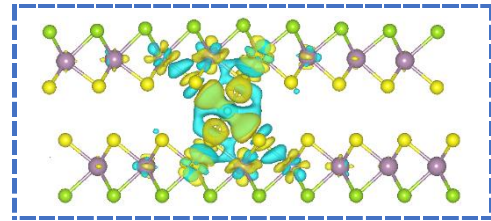

10%

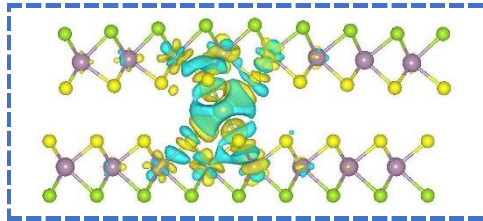

15%

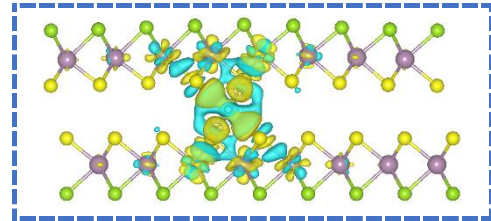

15%

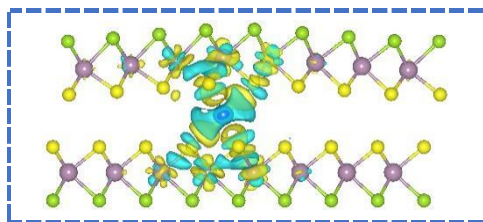

20%

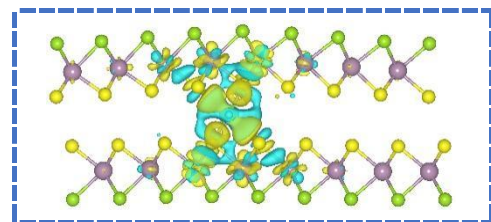

20%

(e) S/S ac

(f) S/S aa'

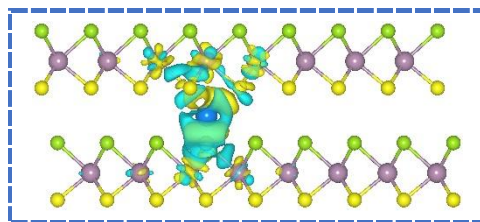

0

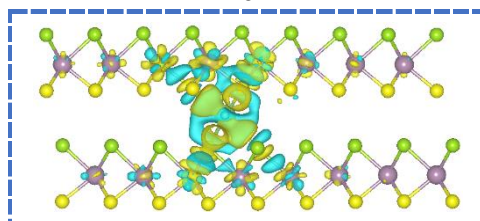

5%

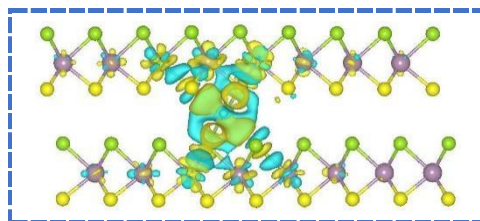

10%

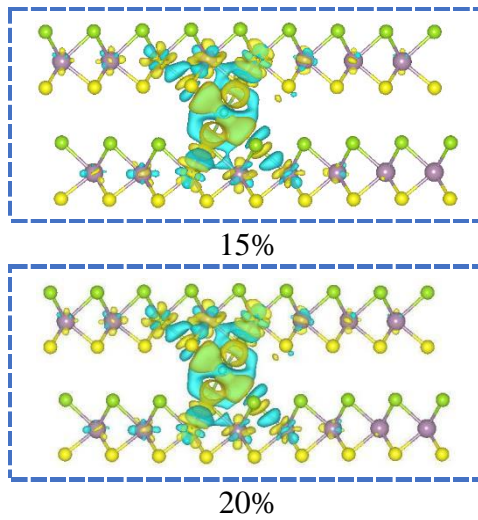

(g) S/Se aa'(uniform strain)

Fig. S5. Charge density difference plots (side views) for the adsorption of a Li ion on MoSSe bilayer with different stacking and loads. The yellow color indicating charge accumulation and blue color representing charge depletion.
